# Supplementary material for: Marine paralytic shellfish toxins: chemical properties, mode of action, newer analogues, and structure–toxicity relationship
Source: Royal Society of Chemistry journal article supplement (doi:10.1039/d1np00009h), 2021-06-30
Supplement: d1np00009h1.pdf [file d1np00009h1.pdf]

**Supplementary information (SI)**

**Marine paralytic shellfish toxins:  
chemical properties, mode of action, newer analogues, and structure-toxicity relationship**

Joana F. Leal,<sup>a</sup> Maria L. S. Cristiano <sup>\*a</sup>

Centre of Marine Sciences (CCMAR) and Department of Chemistry and Pharmacy, Faculty of Science and Technology –  
University of Algarve, Campus de Gambelas 8005-139 Faro, Portugal.

**Table S1** – Bioconversion reactions reported in dinoflagellates, shellfish and/or humans (only STXs toxins produced by marine dinoflagellates were considered).

| Bioconversion reactions (metabolic transformations)                                                                                                                                                              | Observations                                                                                                                                                                                                                                                                                                                                                                                                                                                                                                                                                                                                                                                                                                                                                                                                                                                                                                                                                                                                                                                                                                                  | Organisms       |          |        |
|------------------------------------------------------------------------------------------------------------------------------------------------------------------------------------------------------------------|-------------------------------------------------------------------------------------------------------------------------------------------------------------------------------------------------------------------------------------------------------------------------------------------------------------------------------------------------------------------------------------------------------------------------------------------------------------------------------------------------------------------------------------------------------------------------------------------------------------------------------------------------------------------------------------------------------------------------------------------------------------------------------------------------------------------------------------------------------------------------------------------------------------------------------------------------------------------------------------------------------------------------------------------------------------------------------------------------------------------------------|-----------------|----------|--------|
|                                                                                                                                                                                                                  |                                                                                                                                                                                                                                                                                                                                                                                                                                                                                                                                                                                                                                                                                                                                                                                                                                                                                                                                                                                                                                                                                                                               | Dinoflagellates | Bivalves | Humans |
| <p><b>I.</b></p> <p><b>Reductive cleavage of the O-sulphate group followed by reductive elimination of the N-hydroxyl group.</b></p> <p>GTX1/4 <math>\rightarrow</math> NEO <math>\rightarrow</math> STX</p>     | <p>Described in different parts of the scallops <i>Placopecten magellanicus</i><sup>123</sup>; in digestive glands of scallop <i>Patinopecten yessoensis</i> contaminated with <i>A. tamarense</i><sup>124</sup>; in butter clams fed with <i>A. catenella</i><sup>125</sup>; in mussel <i>Perna viridis</i> contaminated with <i>A. minutum</i> (first part of reaction II)<sup>126</sup>.</p> <p>The conversion GTX2/3 into STX was reported as involving bacteria isolated from intestines of a mussel <i>Mytilus edulis</i><sup>127</sup>. This reaction was first proposed in other marine species (crabs and snails), involving the bacteria <i>Vibrio</i> and <i>Pseudomonas</i> spp. isolated from their viscera (incubation <math>\geq</math> 20h)<sup>128</sup>.</p> <p>Reduction of the O-sulphate group at C11 from GTX1/4 and GTX2/3 to NEO and STX, respectively, is thought to be mediated by glutathione<sup>124</sup>.</p> <p>The conversion GTX2/3 into STX (part of reaction II) is proposed to occur also in humans (gut samples), based on the experiments performed by other authors<sup>134</sup>.</p> |                 | X        |        |
| <p><b>II.</b></p> <p><b>Reductive elimination of the N-hydroxyl group followed by reductive cleavage of the O-sulphate group.</b></p> <p>GTX1/4 <math>\rightarrow</math> GTX2/3 <math>\rightarrow</math> STX</p> | <p>Observed in littleneck clam <i>Protothaca staminea</i>, using purified toxins from <i>Gonyaulax</i> sp.<sup>71</sup>; from <i>A. excavatum</i> and <i>A. minutum</i><sup>130</sup>; incubated with a toxin mixture<sup>131</sup>.</p> <p>Also observed in clam <i>Spisula solidissima</i> fed with <i>Alexandrium</i> spp.<sup>101</sup>; and (except reaction IV) in digestive glands of clams <i>Spisula solida</i> and <i>Scrobicularia plana</i> (in less extension) contaminated with <i>G. Catenatum</i><sup>111</sup>.</p>                                                                                                                                                                                                                                                                                                                                                                                                                                                                                                                                                                                          |                 |          | X      |
| <p><b>III.</b></p> <p>GTX5 (B1) <math>\rightarrow</math> dcSTX</p>                                                                                                                                               |                                                                                                                                                                                                                                                                                                                                                                                                                                                                                                                                                                                                                                                                                                                                                                                                                                                                                                                                                                                                                                                                                                                               |                 |          |        |

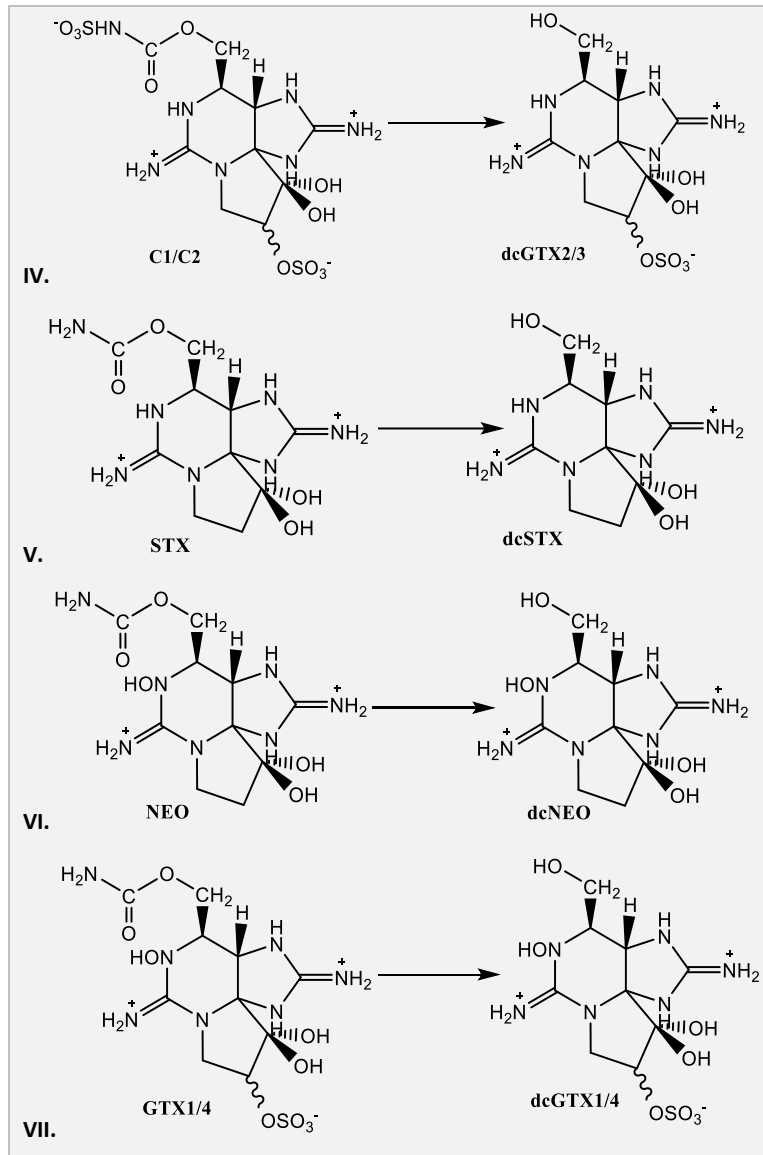

Not detected in butter clams *Saxidomus giganteus* and mussels *M. edulis*, contaminated with *Gonyaulax* sp.<sup>71</sup>; or in clams *M. arenaria* fed with *Alexandrium* spp.<sup>101</sup> and incubated with a toxin mixture<sup>131</sup>.

Reaction IV was also described in adductor muscle of scallops *Chlamys nobilis* (higher extension) and in digestive gland of mussels *P. viridis* (lesser extension) fed with toxic *A. tamarense*<sup>110</sup>. Additionally, reaction VIII was observed after 24 h in mussels *M. edulis* (dcGTX3 prevailed over dcGTX2), but not observed in queen scallops *Chlamys opercularis*, after 144 h<sup>129</sup>.

These reactions appear to be promoted by the enzymatic activity, namely by hydrolytic enzymes, the carbamoylases<sup>71,111,130</sup>.

Reaction V was reported in post-mortem analysis of human tissues (liver, kidney, lung)<sup>18</sup> and human urine<sup>134</sup>.

|                                                                                                                                                                                                                                                                                                                                                                                            |                                                                                                                                                                                                                                                                                                                                                                                                                                                                                                                                                       |   |  |
|--------------------------------------------------------------------------------------------------------------------------------------------------------------------------------------------------------------------------------------------------------------------------------------------------------------------------------------------------------------------------------------------|-------------------------------------------------------------------------------------------------------------------------------------------------------------------------------------------------------------------------------------------------------------------------------------------------------------------------------------------------------------------------------------------------------------------------------------------------------------------------------------------------------------------------------------------------------|---|--|
| <p>VIII.</p> 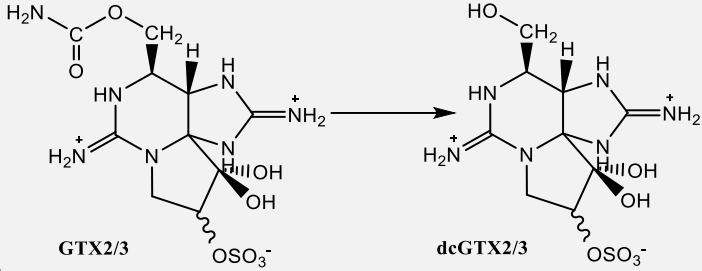 <p>GTX2/3 <math>\rightarrow</math> dcGTX2/3</p> <p><b>Hydrolysis of the carbamate ester from <i>N</i>-sulfacarbamoyl toxins (reactions III and IV) and from carbamate toxins (reactions V to VIII), originating some common products (decarbamoyl toxins).</b></p>                          |                                                                                                                                                                                                                                                                                                                                                                                                                                                                                                                                                       |   |  |
| <p>IX.</p>  <p>C1/C2 <math>\rightarrow</math> GTX2/3</p> <p>X.</p>  <p>C3 <math>\rightarrow</math> GTX1</p> <p><b>Hydrolysis of the <i>N</i>-sulfa group (side chain), originating the correspondent carbamate.</b></p> | <p>Reported in short-necked clams <i>Tapes (Amygdala) japonica</i>, mussels <i>M. edulis</i> and oysters <i>Crassostrea gigas</i> contaminated with two strains of <i>A. tamarense</i> isolated from toxic planktons<sup>109</sup>.</p> <p>Reaction IX reported in the northern quahog (clam) <i>M. mercenaria</i> exposed in laboratory to cultured isolates of <i>Alexandrium</i> (<i>A. tamarense</i> and <i>A. fundyense</i>)<sup>105</sup>, and in digestive glands of mussels <i>P. viridis</i> fed with <i>A. tamarense</i><sup>110</sup>.</p> | X |  |

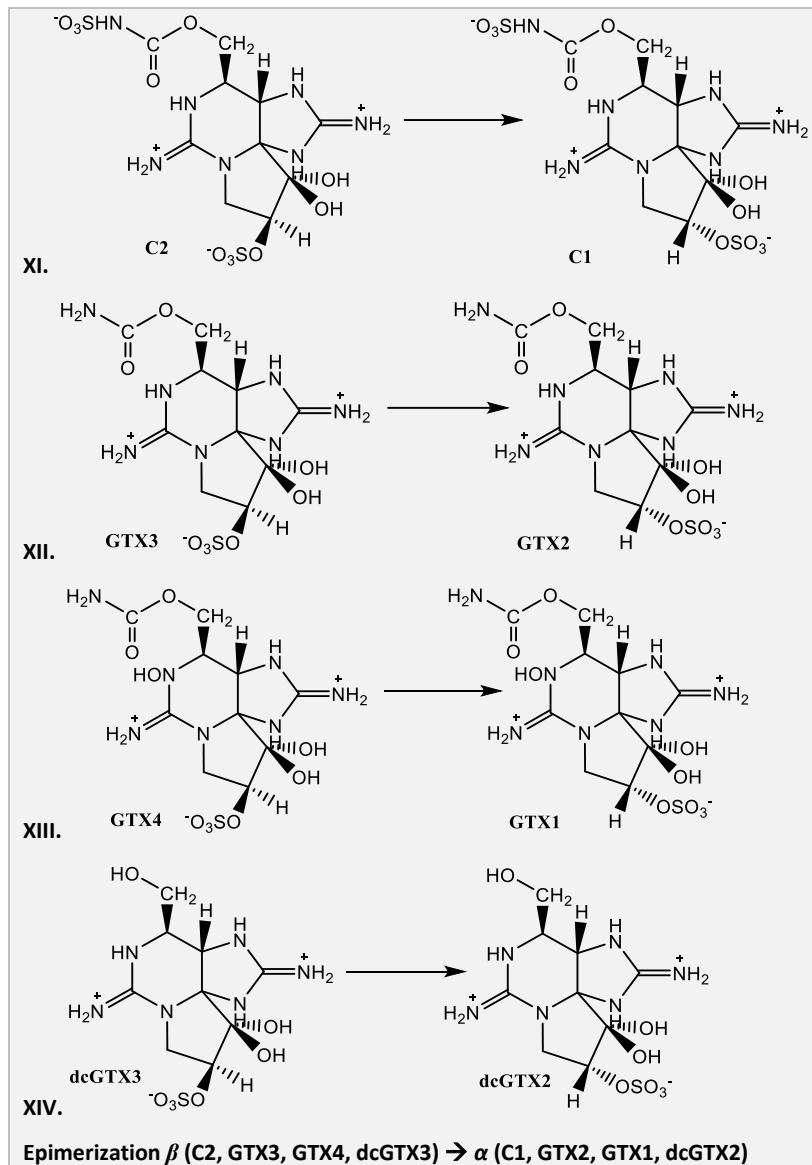

Suggested (reactions XI-XIII) in mussels *M. edulis* and *Modiolus modiolus*, oysters *C. gigas*, cockles *Cardium edule*, clams *Arctica islandica* and *Macrta stultorum*, sword razor *Ensis ensis*, scallops *Pecten maximus* contaminated with *A. fundyense*<sup>30,107</sup>; and in oyster *C. gigas* (except reaction XIII) fed with *A. minutum*<sup>113</sup>.

Bioconversions of C4 and dcGTX4 ( $\beta$  epimers) into C3 and dcGTX1 ( $\alpha$  epimers), respectively, are also expected<sup>106</sup>.

X

|                                                                                                                                                                                                                                                                                                                                   |                                                                                                                                                                                                                                                                                                                                         |          |  |          |
|-----------------------------------------------------------------------------------------------------------------------------------------------------------------------------------------------------------------------------------------------------------------------------------------------------------------------------------|-----------------------------------------------------------------------------------------------------------------------------------------------------------------------------------------------------------------------------------------------------------------------------------------------------------------------------------------|----------|--|----------|
| <p><b>XV.</b> GTX5 (B1)</p> 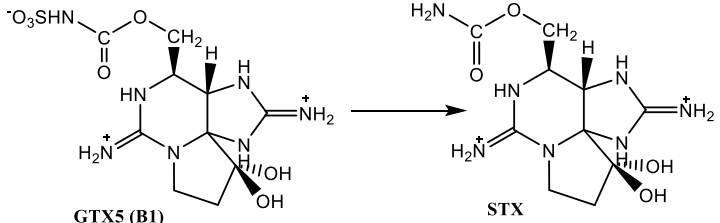 <p><b>XVI.</b> GTX6 (B2)</p>  <p><b>Hydrolysis of the N-sulfa group (side chain), originating the correspondent carbamate.</b></p> | <p>Suggested in clam <i>Tapes japonica</i> fed with <i>A. catenella</i><sup>116</sup>.</p> <p>Reaction XV documented in blue mussels<sup>132</sup>.</p> <p>Hydrolysis of the N-sulfa group is proposed based on the above reactions (IX – X), in agreement with Oshima<sup>106</sup>, who also proposed reaction XVI.</p>               | <p>X</p> |  |          |
| <p><b>XVII.</b> GTX2/3</p>  <p><b>XVIII.</b> STX</p>  <p><b>Oxidation at N1</b></p>                                                                          | <p>Reaction XVII proposed in <i>A. tamarensis</i> extracts<sup>106</sup>, in <i>G. catenatum</i><sup>120</sup>.</p> <p>Both reactions also suggested in human samples<sup>18,134-136</sup>.</p> <p>These reactions in humans occurred in presence of nicotinamide adenine dinucleotide phosphate oxidase (NADPH)<sup>135,136</sup>.</p> | <p>X</p> |  | <p>X</p> |

|                                                                                                                                                                                                                                                           |                                                                                                                                                                                                                                                                                                                                                                     |                   |
|-----------------------------------------------------------------------------------------------------------------------------------------------------------------------------------------------------------------------------------------------------------|---------------------------------------------------------------------------------------------------------------------------------------------------------------------------------------------------------------------------------------------------------------------------------------------------------------------------------------------------------------------|-------------------|
| <p><b>XIX.</b></p> 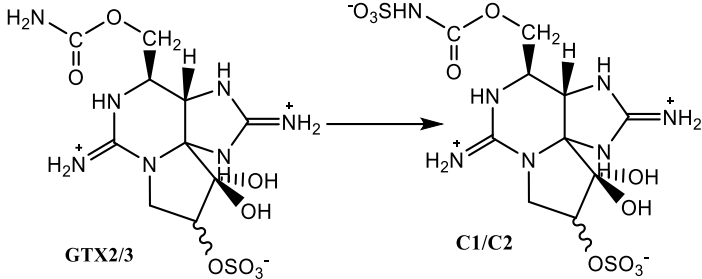 <p>GTX2/3 <math>\longrightarrow</math> C1/C2</p>                                                                                                     |                                                                                                                                                                                                                                                                                                                                                                     |                   |
| <p><b>XX.</b></p>  <p>STX <math>\longrightarrow</math> GTX5 (B1)</p>                                                                                                     | <p>Reactions proposed in cultures of <i>G. catenatum</i><sup>120,121</sup>.</p> <p>Reaction XIX also suggested in cultures of <i>A. tamarense</i><sup>122</sup> and in human samples<sup>17</sup>.</p> <p>The reaction XX did not occur when an extract of <i>A. tamarense</i> was tested, while the occurrence of reaction XXI was not reported<sup>122</sup>.</p> | <p>X</p> <p>X</p> |
| <p><b>XXI.</b></p> <p><b>Introduction of a sulphate group on carbamoyl group (side chain sulfonylation, at N-21)</b></p>  <p>M2 <math>\longrightarrow</math> GTX2/3</p> | <p>Specific sulfotransferase (ST) enzymes have been reported to be responsible for reactions XIX and XX (N-ST) and for reaction XXI (O-ST), both using the sulphate group from 3'-phosphoadenosine 5'-phosphosulfate (PAPS) as source<sup>120,121</sup>.</p>                                                                                                        |                   |

|                                                                                                                                                                                                                                            |                                                                                                                                                                                                                                                                                                                                               |          |  |  |
|--------------------------------------------------------------------------------------------------------------------------------------------------------------------------------------------------------------------------------------------|-----------------------------------------------------------------------------------------------------------------------------------------------------------------------------------------------------------------------------------------------------------------------------------------------------------------------------------------------|----------|--|--|
| <p>XXII.</p> 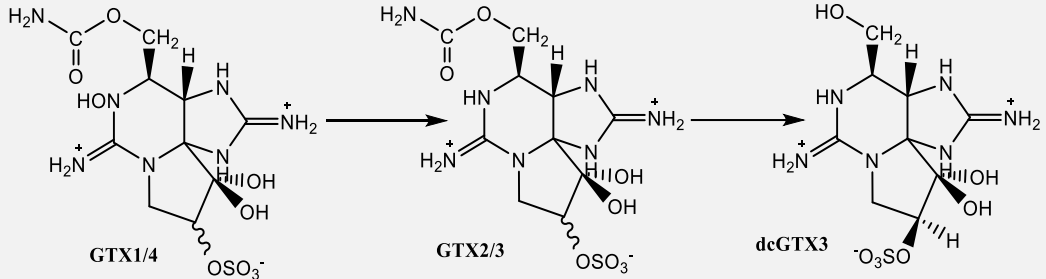 <p>GTX1/4 → GTX2/3 → dcGTX3</p> <p><b>Reductive elimination of the N-hydroxyl group followed by hydrolysis of the carbamate ester.</b></p> | <p>Described in mussels <i>M. edulis</i> (after 24 h)<sup>129</sup>. The increase of GTX2/3 was also observed in lesser extension in cockles <i>Cerastoderma edule</i> and razorfish <i>Ensis arcuatus</i>, but only after 144 h. Not observed in queen scallops <i>C. opercularis</i> (after 144 h).</p>                                     | <p>X</p> |  |  |
| <p>XXIII.</p>  <p>C1/C2 → GTX5 (B1) → GTX6 (B2)</p> <p>XXIV.</p> <p><b>Reductive cleavage of the O-sulphate group at C11.</b></p>                       | <p>Reaction XXIII reported in digestive gland of mussels <i>P. viridis</i> fed with <i>A. tamarense</i>, but not in scallops <i>C. nobilis</i><sup>110</sup>. Like other reactions (e.g., second step of reaction II), this may be mediated by natural reductants, like glutathione.</p> <p>Reaction XXIV is also expected<sup>106</sup>.</p> | <p>X</p> |  |  |



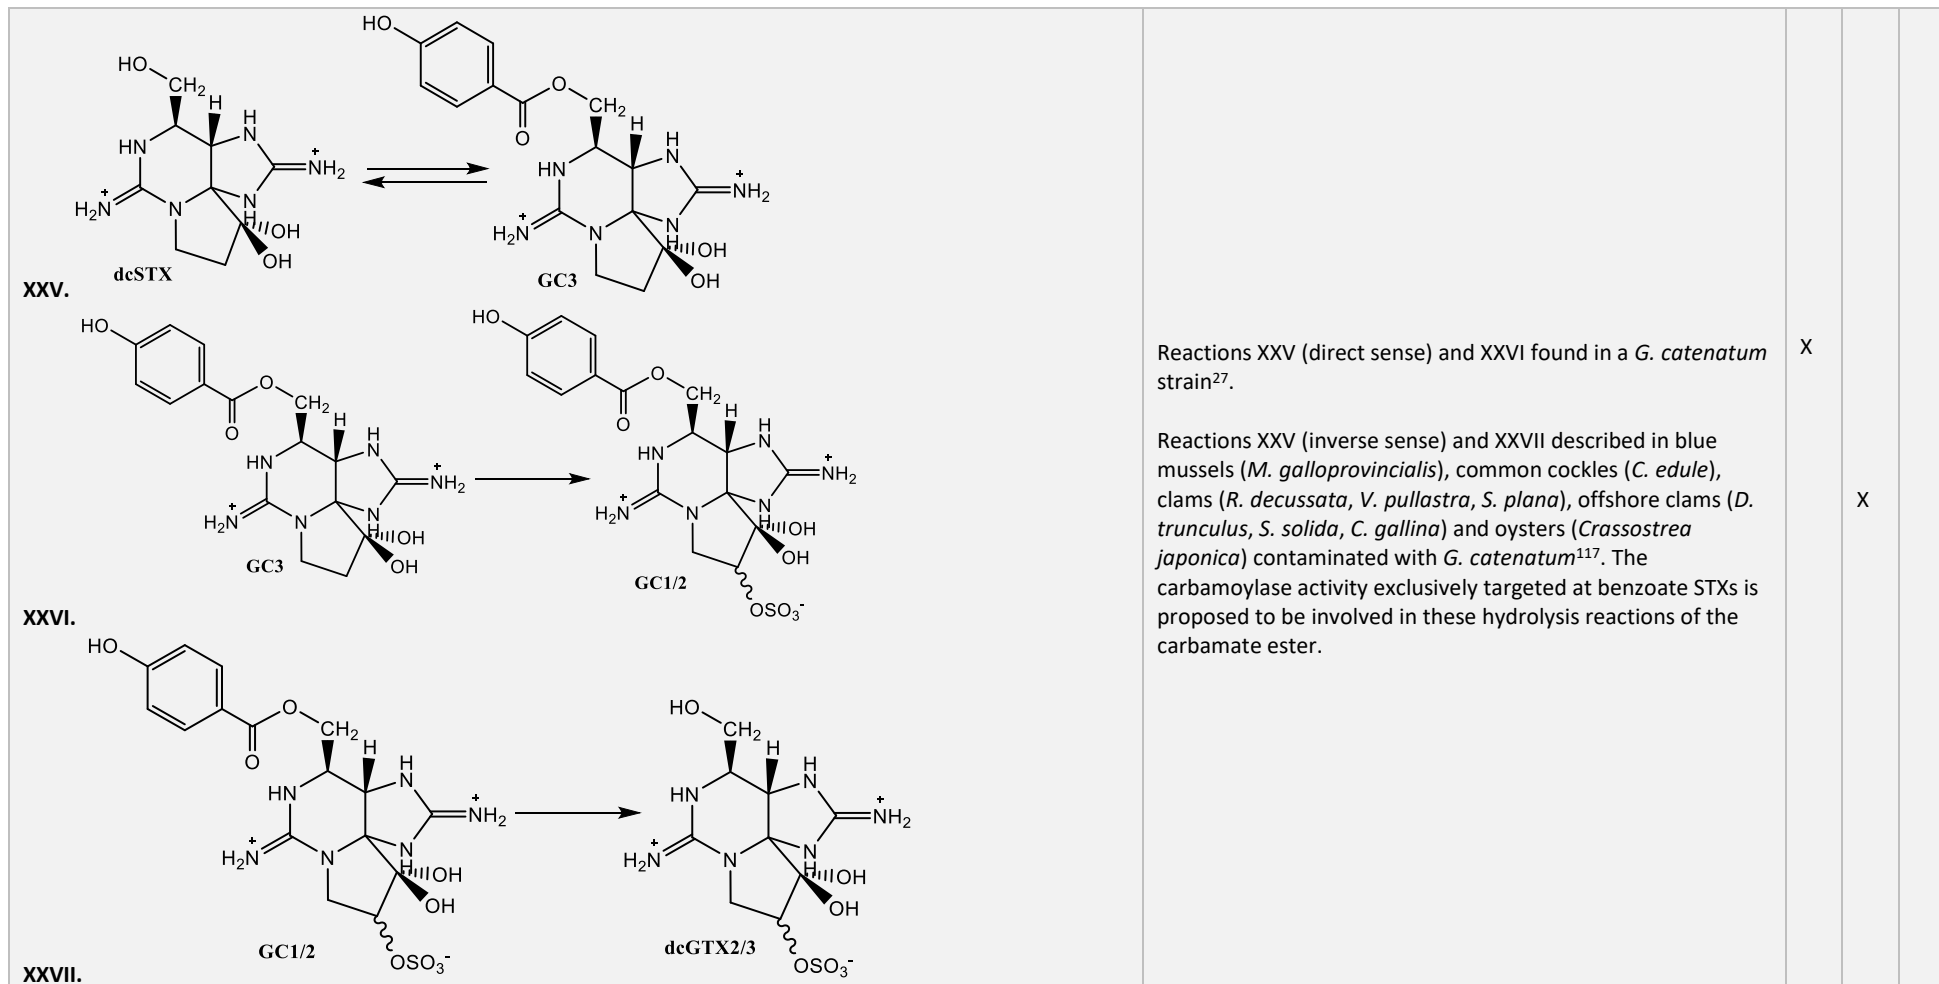

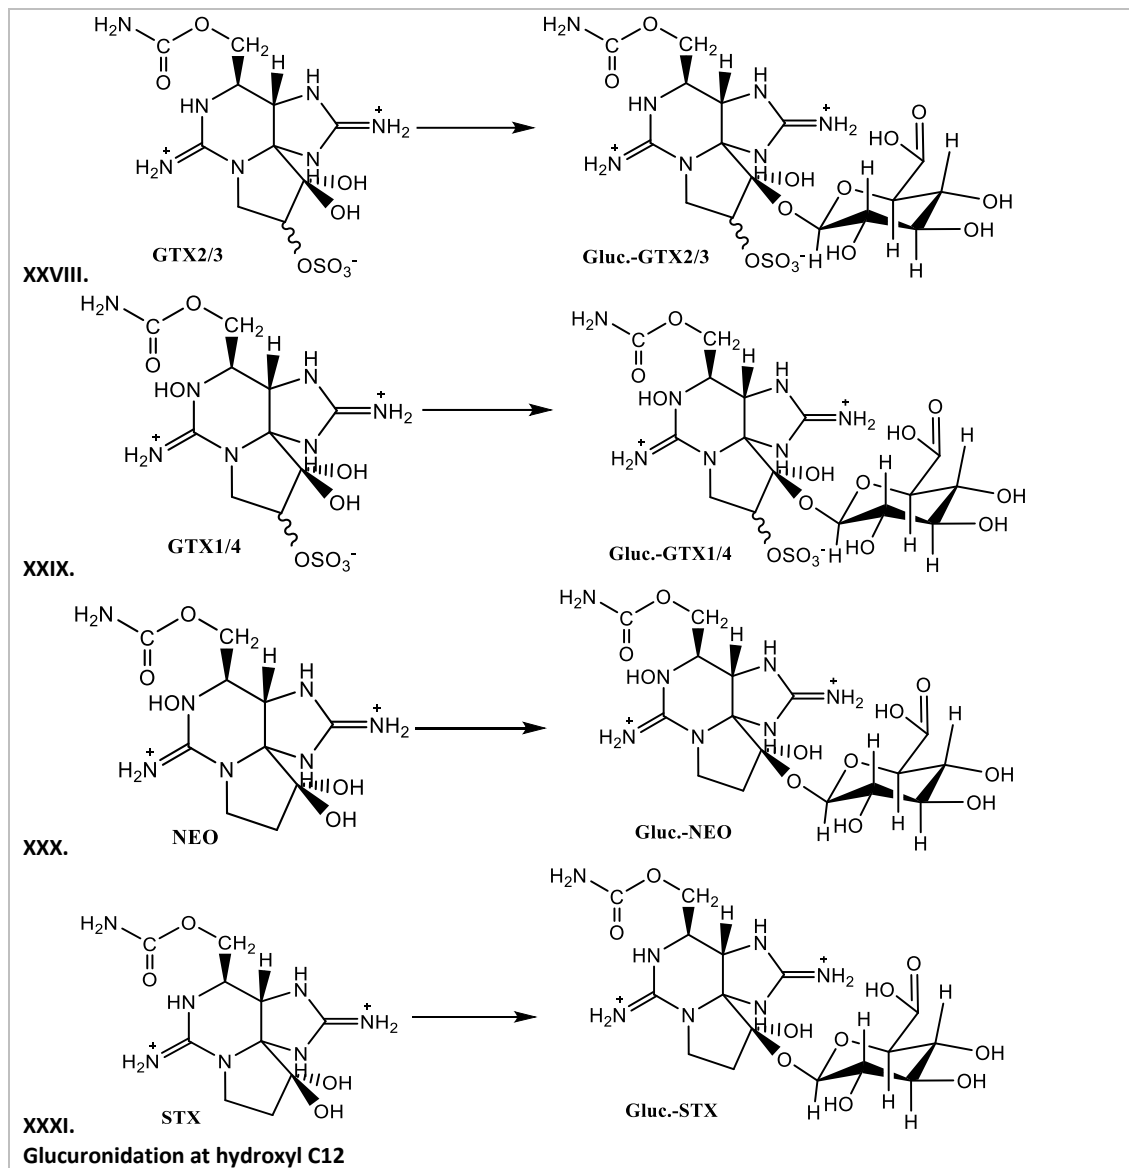

Enzymatic transformations proposed in human liver microsomes after incubation with purified STX<sub>5</sub><sup>135,136</sup>. The reactions occurred in the presence of uridine 5'-diphospho-glucuronic acid (UDPGA), which transferred the glucuronosyl group to the toxin.

Glucuronidation products were searched in scallops *Chlamys farreri* and mussels *M. galloprovincialis* exposed to *A. pacificum*, but they were not found<sup>114</sup>.

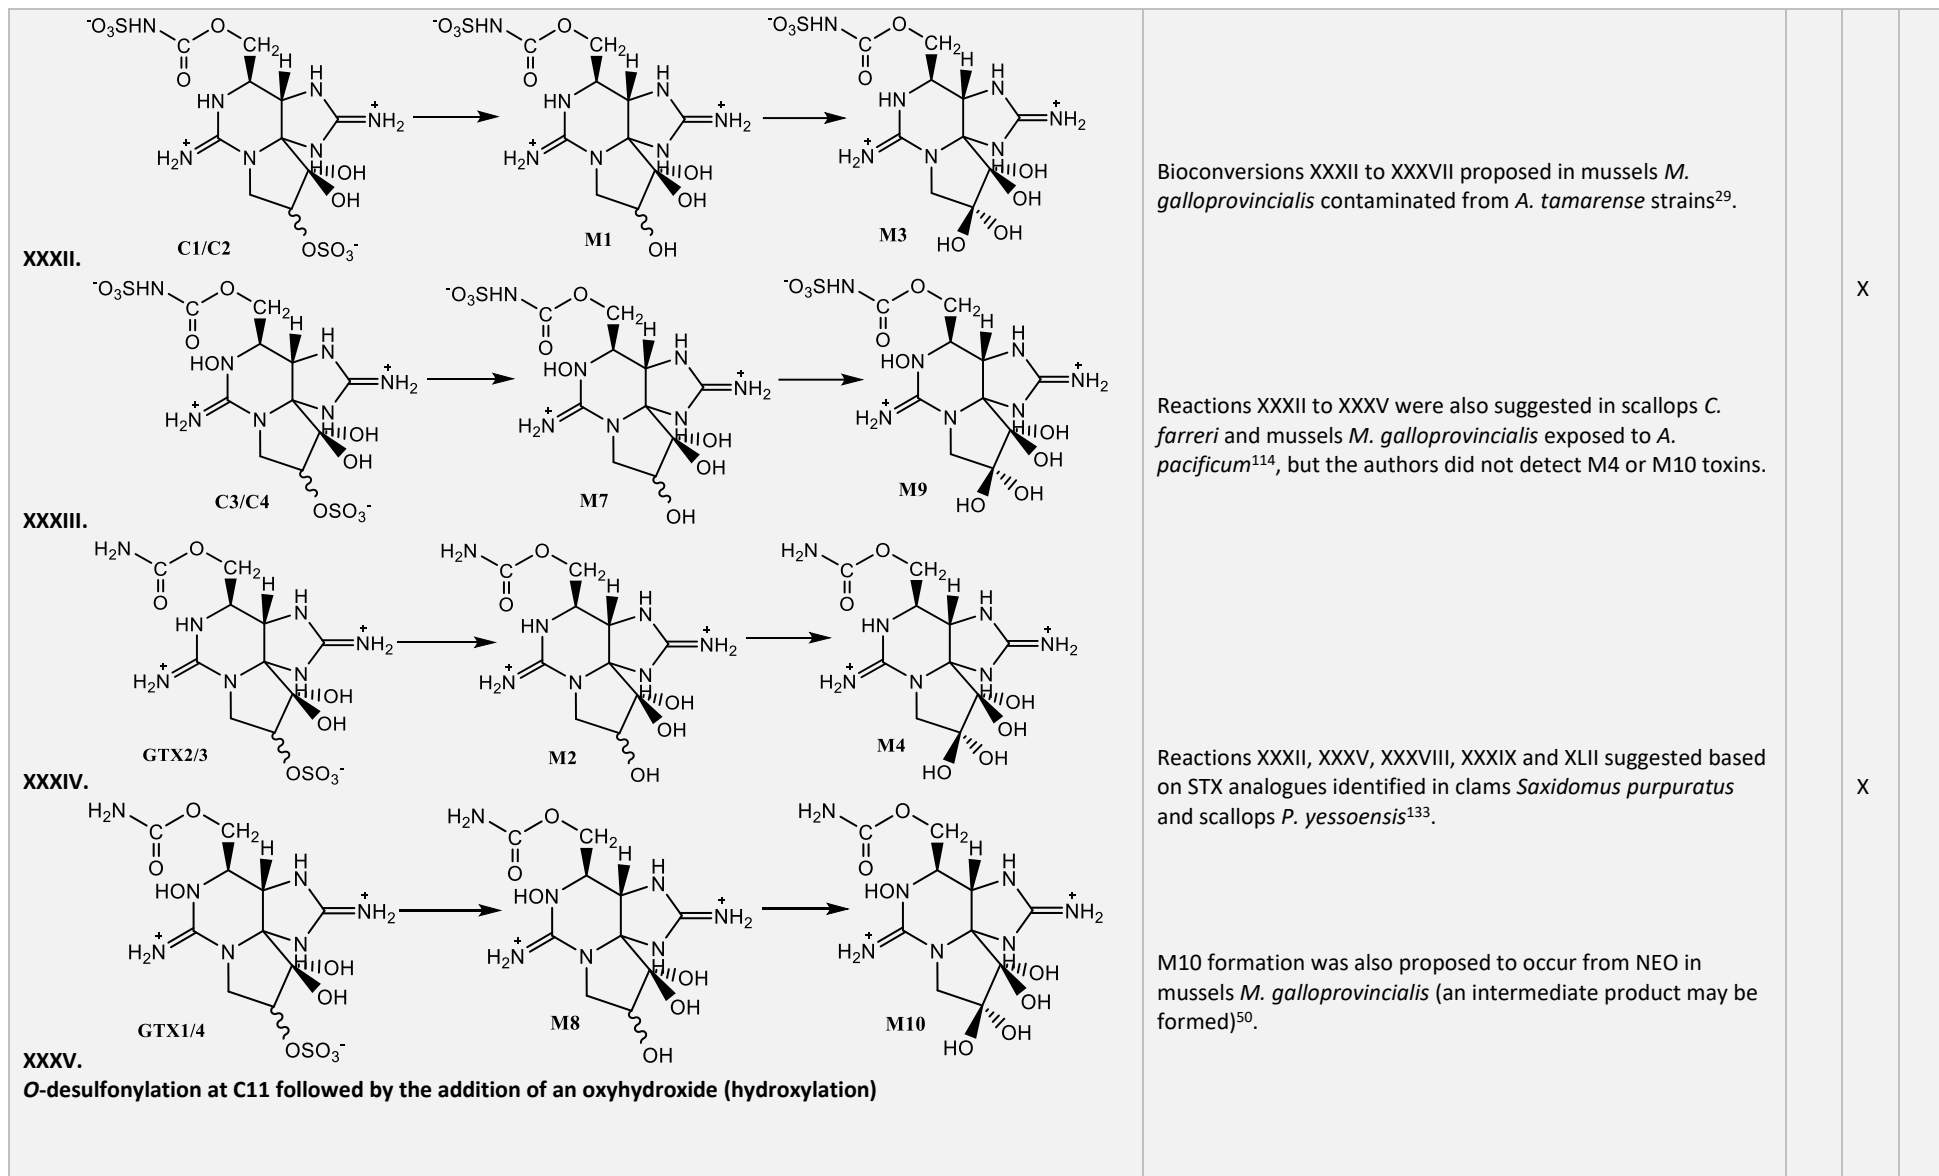

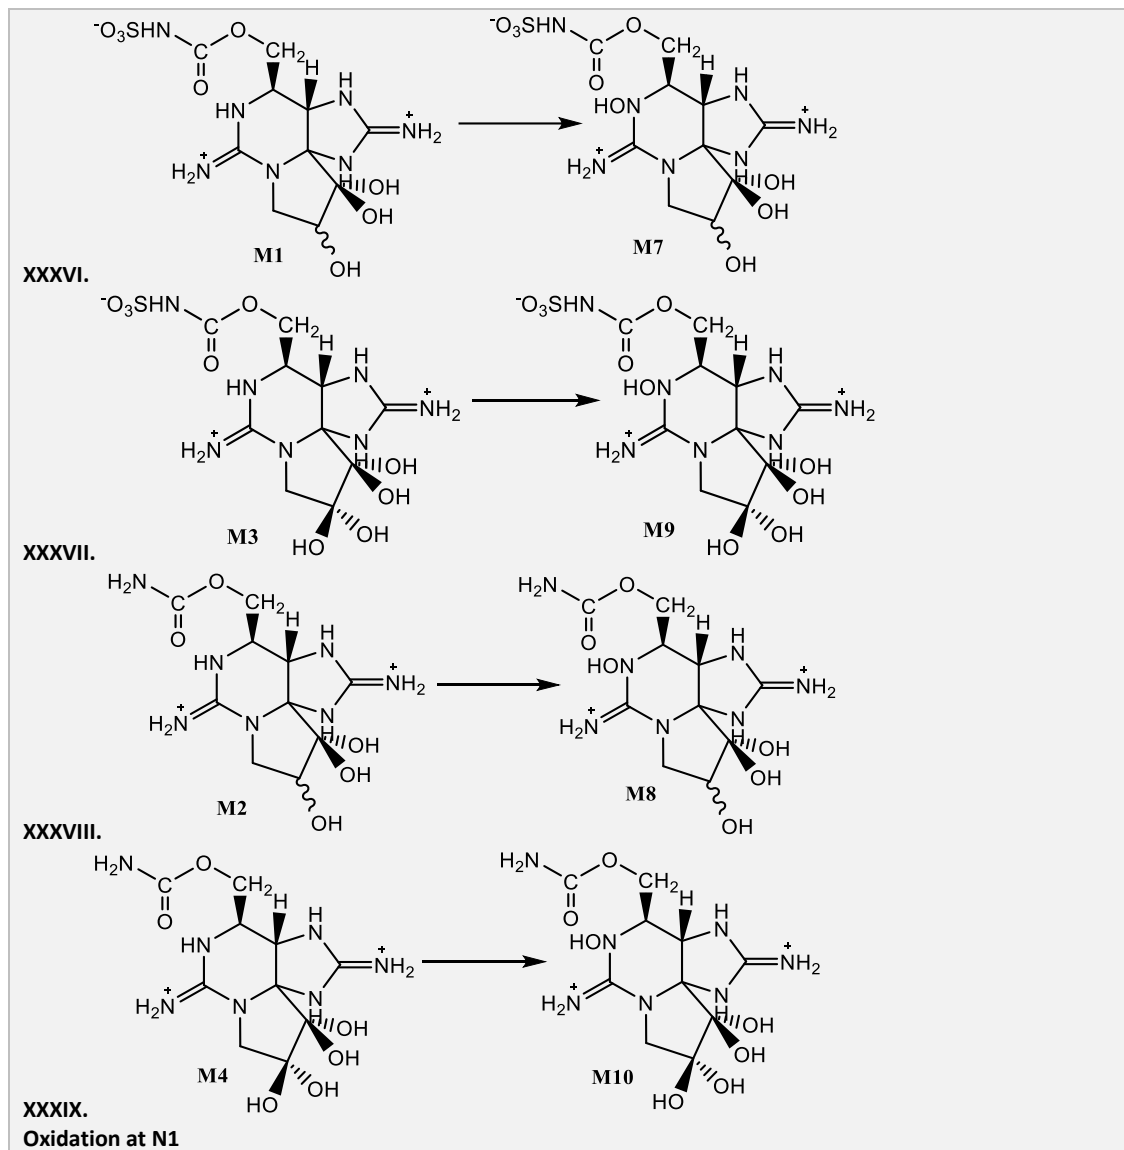

Reactions XXXII, XXXIII, XXXVI, XXXVII described in mussels *M. edulis* fed with toxic *A. fundyense* culture<sup>30</sup>. Additionally, reactions XL to XLIV were suggested.

The second step of reaction XXXII (hydroxylation of M1 into M3) was suggested in several bivalve species (mussels *M. galloprovincialis*, cockles *C. edule*, clams *Ruditapes decussatus* and *Donax trunculus*, and razor clams *Ensis* spp.) contaminated with *G. catenatum*<sup>112</sup>. However, this author proposed another precursor to M1 (reaction XLV).

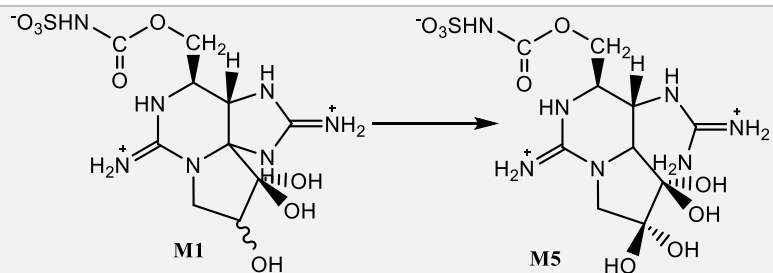

Loss of H<sub>2</sub>O followed by the attack of hydroxyl group at C11 and consequent opening of ring at C4.

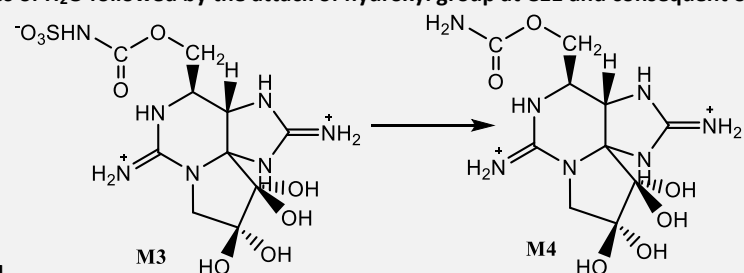

XLI.

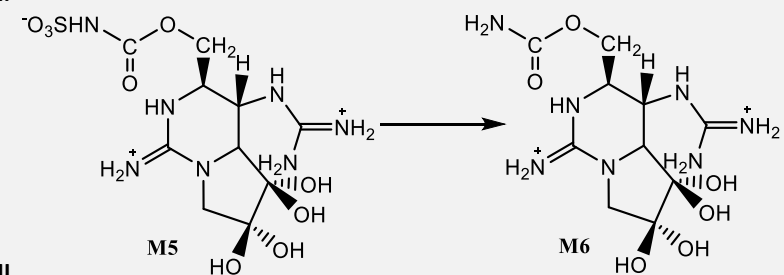

XLII.

Hydrolysis of the *N*-sulfa group (side chain), originating the corresponding carbamate.

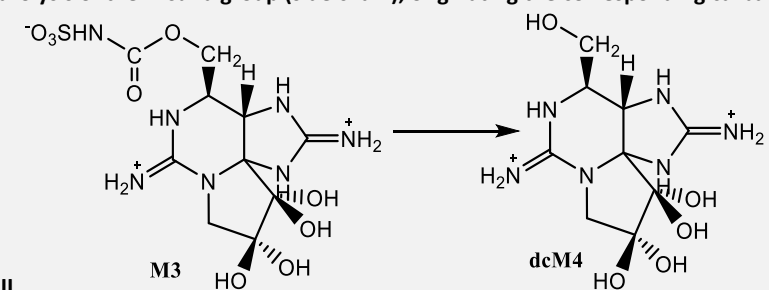

XLIII.

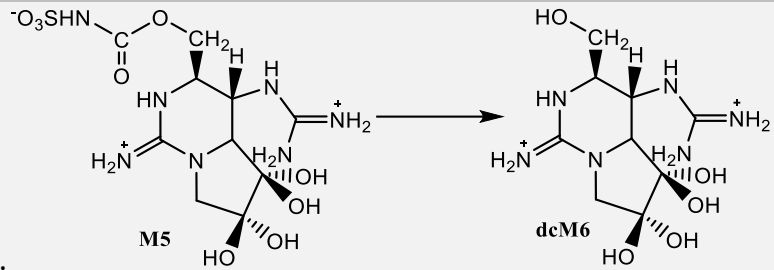

XLIV.

**Hydrolysis of the carbamate ester from *N*-sulfacarbamoyl toxins, originating the corresponding decarbamoyl toxins.**

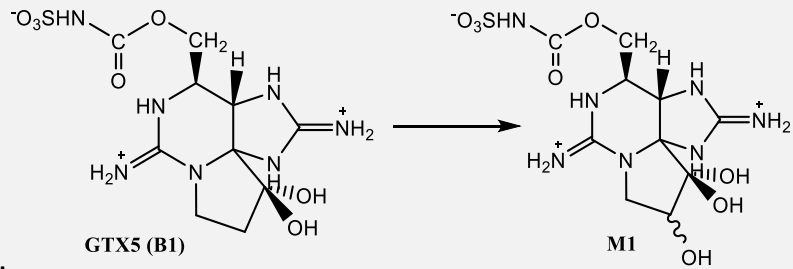

XLV.

**Hydroxylation at C11**
